# Supplementary material for: Characterizing Critical Transition State for Network Fundamental Diagram
Source: Hindawi journal article supplement (doi:10.1155/2018/4839729), 2018-11-18
Supplement: f1 [file 4839729.f1.csv]

STATIONID	CALENDAR_KEY	FIVEMINX		OCCUPANCY	VOLUME
106204	20150801	0		0.0554	22
106204	20150801	5		0.0582	20
106204	20150801	10		0.047	21
106204	20150801	15		0.0634	21
106204	20150801	20		0.0345	22
106204	20150801	25		0.0854	22
106204	20150801	30		0.0513	23
106204	20150801	35		0.0358	19
106204	20150801	40		0.0419	20
106204	20150801	45		0.0456	19
106204	20150801	50		0.0339	18
106204	20150801	55		0.033	16
106204	20150801	100		0.0267	14
106204	20150801	105		0.0537	16
106204	20150801	110		0.0213	12
106204	20150801	115		0.077	14
106204	20150801	120		0.0495	18
106204	20150801	125		0.0335	13
106204	20150801	130		0.0259	14
106204	20150801	135		0.0284	15
106204	20150801	140		0.0279	12
106204	20150801	145		0.0277	14
106204	20150801	150		0.0253	14
106204	20150801	155		0.0321	12
106204	20150801	200		0.0229	13
106204	20150801	205		0.02	10
106204	20150801	210		0.0237	12
106204	20150801	215		0.0232	11
106204	20150801	220		0.0245	13
106204	20150801	225		0.021	10
106204	20150801	230		0.0246	12
106204	20150801	235		0.0226	12
106204	20150801	240		0.0189	9
106204	20150801	245		0.0204	10
106204	20150801	250		0.0232	11
106204	20150801	255		0.0166	9
106204	20150801	300		0.0192	9
106204	20150801	305		0.0191	10
106204	20150801	310		0.018	12
106204	20150801	315		0.0796	11
106204	20150801	320		0.0204	11
106204	20150801	325		0.0203	11
106204	20150801	330		0.0154	8
106204	20150801	335		0.0145	7
106204	20150801	340		0.0191	9
106204	20150801	345		0.0132	6
106204	20150801	350		0.0195	9
106204	20150801	355		0.0166	8
106204	20150801	400		0.0149	6
106204	20150801	405		0.0149	7
106204	20150801	410		0.0147	8
106204	20150801	415		0.0178	7
106204	20150801	420		0.0226	6
106204	20150801	425		0.0173	8
106204	20150801	430		0.0206	10
106204	20150801	435		0.0171	7
106204	20150801	440		0.0179	6
106204	20150801	445		0.015	6
106204	20150801	450		0.0135	6
106204	20150801	455		0.0192	10
106204	20150801	500		0.0336	8
106204	20150801	505		0.0184	11
106204	20150801	510		0.0185	9
106204	20150801	515		0.0183	10
106204	20150801	520		0.038	8
106204	20150801	525		0.0363	10
106204	20150801	530		0.0336	11
106204	20150801	535		0.0316	13
106204	20150801	540		0.0352	16
106204	20150801	545		0.0296	15
106204	20150801	550		0.0686	18
106204	20150801	555		0.0244	13
106204	20150801	600		0.0956	17
106204	20150801	605		0.0508	18
106204	20150801	610		0.0381	16
106204	20150801	615		0.0561	19
106204	20150801	620		0.0336	16
106204	20150801	625		0.0688	21
106204	20150801	630		0.1293	23
106204	20150801	635		0.0848	21
106204	20150801	640		0.0994	23
106204	20150801	645		0.0999	26
106204	20150801	650		0.0908	29
106204	20150801	655		0.1142	32
106204	20150801	700		0.1699	29
106204	20150801	705		0.3277	33
106204	20150801	710		0.143	36
106204	20150801	715		0.225	36
106204	20150801	720		0.2537	34
106204	20150801	725		0.2183	38
106204	20150801	730		0.2037	34
106204	20150801	735		0.2033	32
106204	20150801	740		0.1938	40
106204	20150801	745		0.3988	52
106204	20150801	750		0.2087	46
106204	20150801	755		0.282	56
106204	20150801	800		0.3277	45
106204	20150801	805		0.3211	48
106204	20150801	810		0.3498	52
106204	20150801	815		0.3605	58
106204	20150801	820		0.3626	50
106204	20150801	825		0.4173	60
106204	20150801	830		0.5166	61
106204	20150801	835		0.3826	54
106204	20150801	840		0.347	56
106204	20150801	845		0.345	57
106204	20150801	850		0.5591	52
106204	20150801	855		0.531	60
106204	20150801	900		0.5354	62
106204	20150801	905		0.442	59
106204	20150801	910		0.37	48
106204	20150801	915		0.3956	58
106204	20150801	920		0.3478	51
106204	20150801	925		0.4003	52
106204	20150801	930		0.3598	52
106204	20150801	935		0.4303	57
106204	20150801	940		0.3712	53
106204	20150801	945		0.4168	54
106204	20150801	950		0.368	42
106204	20150801	955		0.3806	52
106204	20150801	1000		0.3613	54
106204	20150801	1005		0.2172	50
106204	20150801	1010		0.4086	54
106204	20150801	1015		0.4833	48
106204	20150801	1020		0.5626	64
106204	20150801	1025		0.2351	52
106204	20150801	1030		0.1851	50
106204	20150801	1035		0.3747	55
106204	20150801	1040		0.3647	51
106204	20150801	1045		0.2651	50
106204	20150801	1050		0.3882	44
106204	20150801	1055		0.2874	50
106204	20150801	1100		0.2908	55
106204	20150801	1105		0.2541	51
106204	20150801	1110		0.2234	50
106204	20150801	1115		0.3639	53
106204	20150801	1120		0.2594	52
106204	20150801	1125		0.2949	58
106204	20150801	1130		0.1597	49
106204	20150801	1135		0.3426	49
106204	20150801	1140		0.2962	49
106204	20150801	1145		0.2314	58
106204	20150801	1150		0.2896	54
106204	20150801	1155		0.2757	51
106204	20150801	1200		0.4604	62
106204	20150801	1205		0.2019	54
106204	20150801	1210		0.1848	50
106204	20150801	1215		0.2643	47
106204	20150801	1220		0.3416	52
106204	20150801	1225		0.2451	50
106204	20150801	1230		0.193	50
106204	20150801	1235		0.2193	45
106204	20150801	1240		0.2354	52
106204	20150801	1245		0.2959	54
106204	20150801	1250		0.2783	51
106204	20150801	1255		0.1729	45
106204	20150801	1300		0.1594	42
106204	20150801	1305		0.2463	50
106204	20150801	1310		0.1896	53
106204	20150801	1315		0.1983	43
106204	20150801	1320		0.3176	46
106204	20150801	1325		0.2726	57
106204	20150801	1330		0.3573	53
106204	20150801	1335		0.2861	44
106204	20150801	1340		0.2841	44
106204	20150801	1345		0.3205	46
106204	20150801	1350		0.2667	51
106204	20150801	1355		0.2421	46
106204	20150801	1400		0.2603	48
106204	20150801	1405		0.2581	43
106204	20150801	1410		0.2894	47
106204	20150801	1415		0.2092	49
106204	20150801	1420		0.2316	45
106204	20150801	1425		0.2565	47
106204	20150801	1430		0.267	51
106204	20150801	1435		0.2416	50
106204	20150801	1440		0.2377	47
106204	20150801	1445		0.2937	43
106204	20150801	1450		0.2413	47
106204	20150801	1455		0.214	50
106204	20150801	1500		0.2136	50
106204	20150801	1505		0.2466	46
106204	20150801	1510		0.4531	51
106204	20150801	1515		0.2557	54
106204	20150801	1520		0.2459	47
106204	20150801	1525		0.2674	46
106204	20150801	1530		0.2465	50
106204	20150801	1535		0.2029	43
106204	20150801	1540		0.2544	43
106204	20150801	1545		0.1764	40
106204	20150801	1550		0.2104	47
106204	20150801	1555		0.2435	40
106204	20150801	1600		0.255	47
106204	20150801	1605		0.198	39
106204	20150801	1610		0.2571	47
106204	20150801	1615		0.2984	45
106204	20150801	1620		0.1665	48
106204	20150801	1625		0.2676	49
106204	20150801	1630		0.1738	43
106204	20150801	1635		0.2048	50
106204	20150801	1640		0.3398	55
106204	20150801	1645		0.2601	51
106204	20150801	1650		0.2623	43
106204	20150801	1655		0.2482	56
106204	20150801	1700		0.2415	57
106204	20150801	1705		0.258	55
106204	20150801	1710		0.3845	50
106204	20150801	1715		0.4076	49
106204	20150801	1720		0.3981	55
106204	20150801	1725		0.5087	59
106204	20150801	1730		0.4411	59
106204	20150801	1735		0.3759	57
106204	20150801	1740		0.5043	58
106204	20150801	1745		0.2848	56
106204	20150801	1750		0.2779	57
106204	20150801	1755		0.3044	51
106204	20150801	1800		0.3757	53
106204	20150801	1805		0.3353	56
106204	20150801	1810		0.3806	54
106204	20150801	1815		0.3549	55
106204	20150801	1820		0.3265	54
106204	20150801	1825		0.3174	55
106204	20150801	1830		0.1626	51
106204	20150801	1835		0.2744	45
106204	20150801	1840		0.1929	44
106204	20150801	1845		0.2072	45
106204	20150801	1850		0.2318	49
106204	20150801	1855		0.2363	49
106204	20150801	1900		0.2332	46
106204	20150801	1905		0.1938	46
106204	20150801	1910		0.127	38
106204	20150801	1915		0.2364	49
106204	20150801	1920		0.2822	44
106204	20150801	1925		0.1568	39
106204	20150801	1930		0.1578	39
106204	20150801	1935		0.1998	42
106204	20150801	1940		0.1455	42
106204	20150801	1945		0.2268	44
106204	20150801	1950		0.1686	42
106204	20150801	1955		0.216	40
106204	20150801	2000		0.1374	41
106204	20150801	2005		0.157	38
106204	20150801	2010		0.1947	36
106204	20150801	2015		0.207	40
106204	20150801	2020		0.2102	40
106204	20150801	2025		0.1543	37
106204	20150801	2030		0.1716	38
106204	20150801	2035		0.2027	41
106204	20150801	2040		0.1134	41
106204	20150801	2045		0.2421	39
106204	20150801	2050		0.1321	34
106204	20150801	2055		0.1948	40
106204	20150801	2100		0.1619	33
106204	20150801	2105		0.0819	32
106204	20150801	2110		0.1873	35
106204	20150801	2115		0.1151	35
106204	20150801	2120		0.1196	33
106204	20150801	2125		0.0957	32
106204	20150801	2130		0.1239	30
106204	20150801	2135		0.168	30
106204	20150801	2140		0.0953	31
106204	20150801	2145		0.119	30
106204	20150801	2150		0.0712	30
106204	20150801	2155		0.0863	26
106204	20150801	2200		0.0906	30
106204	20150801	2205		0.0556	26
106204	20150801	2210		0.0946	28
106204	20150801	2215		0.045	24
106204	20150801	2220		0.0771	25
106204	20150801	2225		0.0769	24
106204	20150801	2230		0.0586	23
106204	20150801	2235		0.0604	23
106204	20150801	2240		0.0449	21
106204	20150801	2245		0.0394	20
106204	20150801	2250		0.125	23
106204	20150801	2255		0.0422	19
106204	20150801	2300		0.0634	23
106204	20150801	2305		0.0704	20
106204	20150801	2310		0.0356	19
106204	20150801	2315		0.0377	17
106204	20150801	2320		0.0392	19
106204	20150801	2325		0.0381	21
106204	20150801	2330		0.0315	17
106204	20150801	2335		0.0368	18
106204	20150801	2340		0.0367	21
106204	20150801	2345		0.0346	17
106204	20150801	2350		0.0433	21
106204	20150801	2355		0.0347	19
106204	20150802	0		0.0463	20
106204	20150802	5		0.0483	18
106204	20150802	10		0.0408	22
106204	20150802	15		0.0352	20
106204	20150802	20		0.0619	20
106204	20150802	25		0.0435	22
106204	20150802	30		0.048	19
106204	20150802	35		0.035	18
106204	20150802	40		0.0623	18
106204	20150802	45		0.0464	18
106204	20150802	50		0.0366	17
106204	20150802	55		0.0364	17
106204	20150802	100		0.032	17
106204	20150802	105		0.029	13
106204	20150802	110		0.041	17
106204	20150802	115		0.104	16
106204	20150802	120		0.0293	16
106204	20150802	125		0.061	12
106204	20150802	130		0.0515	15
106204	20150802	135		0.0254	12
106204	20150802	140		0.0244	14
106204	20150802	145		0.0224	10
106204	20150802	150		0.0218	12
106204	20150802	155		0.0187	11
106204	20150802	200		0.0166	9
106204	20150802	205		0.0222	11
106204	20150802	210		0.0258	13
106204	20150802	215		0.029	11
106204	20150802	220		0.0343	12
106204	20150802	225		0.0227	13
106204	20150802	230		0.0606	16
106204	20150802	235		0.0233	11
106204	20150802	240		0.0265	9
106204	20150802	245		0.0274	9
106204	20150802	250		0.017	10
106204	20150802	255		0.0157	10
106204	20150802	300		0.0164	9
106204	20150802	305		0.0181	10
106204	20150802	310		0.0389	11
106204	20150802	315		0.0177	9
106204	20150802	320		0.0174	12
106204	20150802	325		0.0159	9
106204	20150802	330		0.015	8
106204	20150802	335		0.0164	9
106204	20150802	340		0.0135	6
106204	20150802	345		0.0149	6
106204	20150802	350		0.0176	7
106204	20150802	355		0.0214	10
106204	20150802	400		0.017	9
106204	20150802	405		0.017	9
106204	20150802	410		0.0092	7
106204	20150802	415		0.0462	7
106204	20150802	420		0.0144	6
106204	20150802	425		0.015	7
106204	20150802	430		0.0144	8
106204	20150802	435		0.0145	7
106204	20150802	440		0.0142	6
106204	20150802	445		0.0217	8
106204	20150802	450		0.0137	9
106204	20150802	455		0.046	9
106204	20150802	500		0.0194	8
106204	20150802	505		0.0409	9
106204	20150802	510		0.0264	11
106204	20150802	515		0.0146	7
106204	20150802	520		0.0261	9
106204	20150802	525		0.02	10
106204	20150802	530		0.0217	12
106204	20150802	535		0.0232	12
106204	20150802	540		0.0525	13
106204	20150802	545		0.0275	15
106204	20150802	550		0.0249	14
106204	20150802	555		0.0367	15
106204	20150802	600		0.0571	16
106204	20150802	605		0.028	17
106204	20150802	610		0.0296	18
106204	20150802	615		0.0299	15
106204	20150802	620		0.0331	18
106204	20150802	625		0.1122	17
106204	20150802	630		0.1475	22
106204	20150802	635		0.0903	23
106204	20150802	640		0.0817	21
106204	20150802	645		0.1114	24
106204	20150802	650		0.0854	24
106204	20150802	655		0.1327	28
106204	20150802	700		0.1327	21
106204	20150802	705		0.1437	31
106204	20150802	710		0.1173	28
106204	20150802	715		0.1588	33
106204	20150802	720		0.149	34
106204	20150802	725		0.1654	31
106204	20150802	730		0.1595	32
106204	20150802	735		0.3569	35
106204	20150802	740		0.2494	37
106204	20150802	745		0.1801	39
106204	20150802	750		0.1795	43
106204	20150802	755		0.2586	39
106204	20150802	800		0.2059	44
106204	20150802	805		0.1993	42
106204	20150802	810		0.2762	46
106204	20150802	815		0.1917	47
106204	20150802	820		0.2464	47
106204	20150802	825		0.2778	53
106204	20150802	830		0.2009	52
106204	20150802	835		0.1758	45
106204	20150802	840		0.2062	48
106204	20150802	845		0.1493	50
106204	20150802	850		0.3135	54
106204	20150802	855		0.31	53
106204	20150802	900		0.3098	54
106204	20150802	905		0.271	54
106204	20150802	910		0.2086	43
106204	20150802	915		0.2549	54
106204	20150802	920		0.2563	49
106204	20150802	925		0.2651	51
106204	20150802	930		0.1938	52
106204	20150802	935		0.1808	49
106204	20150802	940		0.2728	50
106204	20150802	945		0.2754	52
106204	20150802	950		0.3663	49
106204	20150802	955		0.3108	55
106204	20150802	1000		0.2496	50
106204	20150802	1005		0.1545	45
106204	20150802	1010		0.246	50
106204	20150802	1015		0.2611	57
106204	20150802	1020		0.2716	52
106204	20150802	1025		0.2893	48
106204	20150802	1030		0.245	45
106204	20150802	1035		0.1836	46
106204	20150802	1040		0.2094	44
106204	20150802	1045		0.1732	45
106204	20150802	1050		0.3989	48
106204	20150802	1055		0.3404	44
106204	20150802	1100		0.1791	50
106204	20150802	1105		0.274	51
106204	20150802	1110		0.1412	47
106204	20150802	1115		0.2934	49
106204	20150802	1120		0.2555	52
106204	20150802	1125		0.2301	51
106204	20150802	1130		0.1724	46
106204	20150802	1135		0.1943	49
106204	20150802	1140		0.1671	46
106204	20150802	1145		0.1623	51
106204	20150802	1150		0.2441	52
106204	20150802	1155		0.2283	50
106204	20150802	1200		0.267	57
106204	20150802	1205		0.1789	54
106204	20150802	1210		0.2142	49
106204	20150802	1215		0.1536	49
106204	20150802	1220		0.2161	51
106204	20150802	1225		0.1698	50
106204	20150802	1230		0.2613	47
106204	20150802	1235		0.2509	48
106204	20150802	1240		0.2578	47
106204	20150802	1245		0.2221	53
106204	20150802	1250		0.2235	49
106204	20150802	1255		0.2048	46
106204	20150802	1300		0.1279	45
106204	20150802	1305		0.2672	49
106204	20150802	1310		0.2032	49
106204	20150802	1315		0.1271	47
106204	20150802	1320		0.1843	48
106204	20150802	1325		0.2719	48
106204	20150802	1330		0.2552	46
106204	20150802	1335		0.1731	47
106204	20150802	1340		0.1957	44
106204	20150802	1345		0.2665	49
106204	20150802	1350		0.2579	46
106204	20150802	1355		0.234	47
106204	20150802	1400		0.2431	47
106204	20150802	1405		0.3042	51
106204	20150802	1410		0.1693	49
106204	20150802	1415		0.2041	48
106204	20150802	1420		0.1687	44
106204	20150802	1425		0.2087	45
106204	20150802	1430		0.2384	50
106204	20150802	1435		0.2112	50
106204	20150802	1440		0.254	48
106204	20150802	1445		0.2287	45
106204	20150802	1450		0.1964	48
106204	20150802	1455		0.1869	45
106204	20150802	1500		0.2928	51
106204	20150802	1505		0.2682	46
106204	20150802	1510		0.2309	45
106204	20150802	1515		0.2276	51
106204	20150802	1520		0.2131	43
106204	20150802	1525		0.2022	44
106204	20150802	1530		0.1669	48
106204	20150802	1535		0.1905	52
106204	20150802	1540		0.1817	47
106204	20150802	1545		0.2178	42
106204	20150802	1550		0.3336	48
106204	20150802	1555		0.2113	49
106204	20150802	1600		0.2099	45
106204	20150802	1605		0.1503	43
106204	20150802	1610		0.1596	43
106204	20150802	1615		0.3121	45
106204	20150802	1620		0.1551	48
106204	20150802	1625		0.183	43
106204	20150802	1630		0.2806	42
106204	20150802	1635		0.2932	49
106204	20150802	1640		0.2299	50
106204	20150802	1645		0.2969	46
106204	20150802	1650		0.3124	38
106204	20150802	1655		0.2126	51
106204	20150802	1700		0.2019	58
106204	20150802	1705		0.2169	54
106204	20150802	1710		0.2859	57
106204	20150802	1715		0.3353	59
106204	20150802	1720		0.377	62
106204	20150802	1725		0.3308	59
106204	20150802	1730		0.3074	55
106204	20150802	1735		0.3114	62
106204	20150802	1740		0.3196	59
106204	20150802	1745		0.3113	51
106204	20150802	1750		0.3078	50
106204	20150802	1755		0.2561	51
106204	20150802	1800		0.222	46
106204	20150802	1805		0.2819	50
106204	20150802	1810		0.1991	51
106204	20150802	1815		0.1179	44
106204	20150802	1820		0.2132	43
106204	20150802	1825		0.1365	45
106204	20150802	1830		0.1784	49
106204	20150802	1835		0.1753	44
106204	20150802	1840		0.1817	43
106204	20150802	1845		0.231	45
106204	20150802	1850		0.1447	43
106204	20150802	1855		0.1875	49
106204	20150802	1900		0.109	41
106204	20150802	1905		0.1177	44
106204	20150802	1910		0.1642	46
106204	20150802	1915		0.1899	41
106204	20150802	1920		0.1428	46
106204	20150802	1925		0.1405	36
106204	20150802	1930		0.1722	43
106204	20150802	1935		0.1419	46
106204	20150802	1940		0.0969	40
106204	20150802	1945		0.1156	44
106204	20150802	1950		0.1344	40
106204	20150802	1955		0.1017	35
106204	20150802	2000		0.09	38
106204	20150802	2005		0.1328	44
106204	20150802	2010		0.1024	37
106204	20150802	2015		0.169	37
106204	20150802	2020		0.1353	39
106204	20150802	2025		0.1741	41
106204	20150802	2030		0.1081	43
106204	20150802	2035		0.1326	39
106204	20150802	2040		0.1142	32
106204	20150802	2045		0.1188	35
106204	20150802	2050		0.1914	36
106204	20150802	2055		0.1111	35
106204	20150802	2100		0.1096	31
106204	20150802	2105		0.0683	28
106204	20150802	2110		0.1037	35
106204	20150802	2115		0.0756	34
106204	20150802	2120		0.0778	36
106204	20150802	2125		0.0605	28
106204	20150802	2130		0.0631	32
106204	20150802	2135		0.0684	27
106204	20150802	2140		0.0591	28
106204	20150802	2145		0.0881	35
106204	20150802	2150		0.0641	32
106204	20150802	2155		0.0683	21
106204	20150802	2200		0.0747	26
106204	20150802	2205		0.0573	26
106204	20150802	2210		0.0825	26
106204	20150802	2215		0.0815	27
106204	20150802	2220		0.0622	24
106204	20150802	2225		0.0382	20
106204	20150802	2230		0.0367	19
106204	20150802	2235		0.0493	23
106204	20150802	2240		0.0474	22
106204	20150802	2245		0.0382	22
106204	20150802	2250		0.0415	22
106204	20150802	2255		0.0359	18
106204	20150802	2300		0.0338	19
106204	20150802	2305		0.0427	22
106204	20150802	2310		0.0387	21
106204	20150802	2315		0.0394	21
106204	20150802	2320		0.0511	21
106204	20150802	2325		0.0485	19
106204	20150802	2330		0.0498	19
106204	20150802	2335		0.0431	23
106204	20150802	2340		0.0335	15
106204	20150802	2345		0.0457	14
106204	20150802	2350		0.0323	16
106204	20150802	2355		0.0289	14
106204	20150803	0		0.0337	16
106204	20150803	5		0.0402	21
106204	20150803	10		0.0436	18
106204	20150803	15		0.0476	17
106204	20150803	20		0.0401	18
106204	20150803	25		0.0798	18
106204	20150803	30		0.0425	14
106204	20150803	35		0.0363	15
106204	20150803	40		0.0279	14
106204	20150803	45		0.0279	13
106204	20150803	50		0.022	12
106204	20150803	55		0.0253	13
106204	20150803	100		0.0223	11
106204	20150803	105		0.0192	9
106204	20150803	110		0.0428	11
106204	20150803	115		0.0183	11
106204	20150803	120		0.0181	10
106204	20150803	125		0.0221	9
106204	20150803	130		0.0207	11
106204	20150803	135		0.0178	10
106204	20150803	140		0.0178	9
106204	20150803	145		0.0167	10
106204	20150803	150		0.014	7
106204	20150803	155		0.013	6
106204	20150803	200		0.0174	8
106204	20150803	205		0.0168	9
106204	20150803	210		0.0163	7
106204	20150803	215		0.0167	9
106204	20150803	220		0.0173	11
106204	20150803	225		0.0182	8
106204	20150803	230		0.016	8
106204	20150803	235		0.0153	8
106204	20150803	240		0.0125	5
106204	20150803	245		0.0178	9
106204	20150803	250		0.0145	8
106204	20150803	255		0.046	7
106204	20150803	300		0.0122	6
106204	20150803	305		0.0114	8
106204	20150803	310		0.0345	6
106204	20150803	315		0.0243	9
106204	20150803	320		0.0125	6
106204	20150803	325		0.0135	6
106204	20150803	330		0.0168	8
106204	20150803	335		0.0302	4
106204	20150803	340		0.0289	5
106204	20150803	345		0.0114	3
106204	20150803	350		0.0127	6
106204	20150803	355		0.0144	6
106204	20150803	400		0.0155	7
106204	20150803	405		0.0109	5
106204	20150803	410		0.0149	6
106204	20150803	415		0.0097	5
106204	20150803	420		0.0074	3
106204	20150803	425		0.0157	5
106204	20150803	430		0.0143	8
106204	20150803	435		0.0124	6
106204	20150803	440		0.0137	6
106204	20150803	445		0.0147	6
106204	20150803	450		0.017	8
106204	20150803	455		0.0129	6
106204	20150803	500		0.0158	8
106204	20150803	505		0.0129	8
106204	20150803	510		0.0147	8
106204	20150803	515		0.0183	10
106204	20150803	520		0.0203	9
106204	20150803	525		0.0267	10
106204	20150803	530		0.0653	13
106204	20150803	535		0.0156	7
106204	20150803	540		0.0656	12
106204	20150803	545		0.0441	14
106204	20150803	550		0.0764	15
106204	20150803	555		0.078	18
106204	20150803	600		0.0732	15
106204	20150803	605		0.0272	14
106204	20150803	610		0.1158	22
106204	20150803	615		0.0784	17
106204	20150803	620		0.0998	20
106204	20150803	625		0.1932	22
106204	20150803	630		0.162	23
106204	20150803	635		0.0958	22
106204	20150803	640		0.201	30
106204	20150803	645		0.1099	30
106204	20150803	650		0.12	40
106204	20150803	655		0.1522	40
106204	20150803	700		0.2403	34
106204	20150803	705		0.2866	37
106204	20150803	710		0.328	48
106204	20150803	715		0.2703	49
106204	20150803	720		0.383	40
106204	20150803	725		0.415	43
106204	20150803	730		0.36	48
106204	20150803	735		0.4212	43
106204	20150803	740		0.3656	46
106204	20150803	745		0.3655	43
106204	20150803	750		0.5023	67
106204	20150803	755		0.4585	55
106204	20150803	800		0.4942	62
106204	20150803	805		0.6705	61
106204	20150803	810		0.6138	59
106204	20150803	815		0.5923	54
106204	20150803	820		0.7162	60
106204	20150803	825		0.5562	60
106204	20150803	830		0.6289	62
106204	20150803	835		0.6085	60
106204	20150803	840		0.6558	54
106204	20150803	845		0.6203	55
106204	20150803	850		0.7338	54
106204	20150803	855		0.6302	59
106204	20150803	900		0.5672	59
106204	20150803	905		0.603	56
106204	20150803	910		0.6969	53
106204	20150803	915		0.5206	53
106204	20150803	920		0.4866	51
106204	20150803	925		0.5329	51
106204	20150803	930		0.6437	61
106204	20150803	935		0.4382	46
106204	20150803	940		0.4267	49
106204	20150803	945		0.5005	49
106204	20150803	950		0.5678	50
106204	20150803	955		0.5761	51
106204	20150803	1000		0.6318	50
106204	20150803	1005		0.5141	51
106204	20150803	1010		0.5594	54
106204	20150803	1015		0.5726	47
106204	20150803	1020		0.3851	52
106204	20150803	1025		0.2671	47
106204	20150803	1030		0.455	54
106204	20150803	1035		0.4646	52
106204	20150803	1040		0.3175	55
106204	20150803	1045		0.3179	50
106204	20150803	1050		0.4323	47
106204	20150803	1055		0.3516	49
106204	20150803	1100		0.3782	50
106204	20150803	1105		0.2692	53
106204	20150803	1110		0.4203	50
106204	20150803	1115		0.3532	45
106204	20150803	1120		0.4	52
106204	20150803	1125		0.2631	49
106204	20150803	1130		0.2074	47
106204	20150803	1135		0.3496	53
106204	20150803	1140		0.3011	50
106204	20150803	1145		0.3005	52
106204	20150803	1150		0.3862	47
106204	20150803	1155		0.2341	51
106204	20150803	1200		0.2235	50
106204	20150803	1205		0.3242	51
106204	20150803	1210		0.156	44
106204	20150803	1215		0.3166	41
106204	20150803	1220		0.2628	46
106204	20150803	1225		0.2806	44
106204	20150803	1230		0.1908	44
106204	20150803	1235		0.1855	40
106204	20150803	1240		0.1424	40
106204	20150803	1245		0.1883	45
106204	20150803	1250		0.1507	43
106204	20150803	1255		0.1609	41
106204	20150803	1300		0.1503	47
106204	20150803	1305		0.2675	47
106204	20150803	1310		0.3354	49
106204	20150803	1315		0.2895	50
106204	20150803	1320		0.2644	54
106204	20150803	1325		0.3599	54
106204	20150803	1330		0.3144	56
106204	20150803	1335		0.381	61
106204	20150803	1340		0.4475	50
106204	20150803	1345		0.4466	58
106204	20150803	1350		0.3519	60
106204	20150803	1355		0.5145	56
106204	20150803	1400		0.4275	53
106204	20150803	1405		0.4787	55
106204	20150803	1410		0.5657	56
106204	20150803	1415		0.5136	54
106204	20150803	1420		0.4479	59
106204	20150803	1425		0.5336	61
106204	20150803	1430		0.384	59
106204	20150803	1435		0.4787	52
106204	20150803	1440		0.5228	54
106204	20150803	1445		0.5538	57
106204	20150803	1450		0.5017	56
106204	20150803	1455		0.5003	54
106204	20150803	1500		0.4239	49
106204	20150803	1505		0.4663	50
106204	20150803	1510		0.5964	53
106204	20150803	1515		0.444	53
106204	20150803	1520		0.5498	58
106204	20150803	1525		0.4307	51
106204	20150803	1530		0.5769	51
106204	20150803	1535		0.3852	55
106204	20150803	1540		0.4179	57
106204	20150803	1545		0.5175	50
106204	20150803	1550		0.551	49
106204	20150803	1555		0.597	55
106204	20150803	1600		0.5386	54
106204	20150803	1605		0.5283	57
106204	20150803	1610		0.3256	47
106204	20150803	1615		0.2709	50
106204	20150803	1620		0.3582	53
106204	20150803	1625		0.4515	50
106204	20150803	1630		0.4525	52
106204	20150803	1635		0.385	55
106204	20150803	1640		0.6339	56
106204	20150803	1645		0.699	51
106204	20150803	1650		0.5884	53
106204	20150803	1655		0.564	59
106204	20150803	1700		0.5491	57
106204	20150803	1705		0.5672	55
106204	20150803	1710		0.7411	60
106204	20150803	1715		0.6963	56
106204	20150803	1720		0.7793	53
106204	20150803	1725		0.6685	58
106204	20150803	1730		0.6831	53
106204	20150803	1735		0.6933	59
106204	20150803	1740		0.6892	56
106204	20150803	1745		0.661	58
106204	20150803	1750		0.7205	61
106204	20150803	1755		0.6759	58
106204	20150803	1800		0.5739	53
106204	20150803	1805		0.5027	56
106204	20150803	1810		0.4649	59
106204	20150803	1815		0.5171	53
106204	20150803	1820		0.664	59
106204	20150803	1825		0.4064	55
106204	20150803	1830		0.3895	50
106204	20150803	1835		0.4986	49
106204	20150803	1840		0.3505	51
106204	20150803	1845		0.2921	54
106204	20150803	1850		0.2935	46
106204	20150803	1855		0.2306	46
106204	20150803	1900		0.2543	47
106204	20150803	1905		0.2053	43
106204	20150803	1910		0.2018	49
106204	20150803	1915		0.165	42
106204	20150803	1920		0.2572	46
106204	20150803	1925		0.1834	47
106204	20150803	1930		0.1859	45
106204	20150803	1935		0.215	43
106204	20150803	1940		0.2401	42
106204	20150803	1945		0.2493	43
106204	20150803	1950		0.2067	39
106204	20150803	1955		0.1898	42
106204	20150803	2000		0.1514	41
106204	20150803	2005		0.226	39
106204	20150803	2010		0.0978	35
106204	20150803	2015		0.2054	40
106204	20150803	2020		0.1939	39
106204	20150803	2025		0.1341	39
106204	20150803	2030		0.2107	36
106204	20150803	2035		0.1568	37
106204	20150803	2040		0.2157	38
106204	20150803	2045		0.1416	37
106204	20150803	2050		0.2362	38
106204	20150803	2055		0.1663	37
106204	20150803	2100		0.1019	35
106204	20150803	2105		0.11	38
106204	20150803	2110		0.1131	37
106204	20150803	2115		0.219	38
106204	20150803	2120		0.2213	39
106204	20150803	2125		0.1143	30
106204	20150803	2130		0.075	30
106204	20150803	2135		0.1048	32
106204	20150803	2140		0.0838	29
106204	20150803	2145		0.0806	28
106204	20150803	2150		0.1083	30
106204	20150803	2155		0.0689	28
106204	20150803	2200		0.074	31
106204	20150803	2205		0.1091	29
106204	20150803	2210		0.0998	23
106204	20150803	2215		0.0754	25
106204	20150803	2220		0.0803	30
106204	20150803	2225		0.0783	29
106204	20150803	2230		0.0547	24
106204	20150803	2235		0.046	24
106204	20150803	2240		0.0677	25
106204	20150803	2245		0.041	19
106204	20150803	2250		0.0649	22
106204	20150803	2255		0.0575	20
106204	20150803	2300		0.0377	19
106204	20150803	2305		0.0358	19
106204	20150803	2310		0.037	19
106204	20150803	2315		0.0421	19
106204	20150803	2320		0.0518	19
106204	20150803	2325		0.0299	16
106204	20150803	2330		0.035	19
106204	20150803	2335		0.0249	14
106204	20150803	2340		0.0339	17
106204	20150803	2345		0.0332	14
106204	20150803	2350		0.0339	17
106204	20150803	2355		0.0267	16
106204	20150804	0		0.0403	18
106204	20150804	5		0.031	18
106204	20150804	10		0.0239	14
106204	20150804	15		0.0277	16
106204	20150804	20		0.0382	17
106204	20150804	25		0.0294	17
106204	20150804	30		0.0291	15
106204	20150804	35		0.0237	13
106204	20150804	40		0.0229	12
106204	20150804	45		0.0514	12
106204	20150804	50		0.0285	14
106204	20150804	55		0.0205	12
106204	20150804	100		0.0216	11
106204	20150804	105		0.0206	11
106204	20150804	110		0.022	11
106204	20150804	115		0.019	11
106204	20150804	120		0.0185	10
106204	20150804	125		0.016	9
106204	20150804	130		0.0166	9
106204	20150804	135		0.016	9
106204	20150804	140		0.0139	6
106204	20150804	145		0.0134	6
106204	20150804	150		0.02	9
106204	20150804	155		0.0155	9
106204	20150804	200		0.0171	8
106204	20150804	205		0.0157	8
106204	20150804	210		0.0136	8
106204	20150804	215		0.0173	10
106204	20150804	220		0.0145	9
106204	20150804	225		0.0179	10
106204	20150804	230		0.0163	9
106204	20150804	235		0.0124	7
106204	20150804	240		0.0163	7
106204	20150804	245		0.0163	10
106204	20150804	250		0.0415	8
106204	20150804	255		0.0182	9
106204	20150804	300		0.0191	7
106204	20150804	305		0.0275	8
106204	20150804	310		0.0108	5
106204	20150804	315		0.0109	6
106204	20150804	320		0.013	8
106204	20150804	325		0.03	7
106204	20150804	330		0.0126	8
106204	20150804	335		0.015	6
106204	20150804	340		0.012	6
106204	20150804	345		0.0129	5
106204	20150804	350		0.0132	6
106204	20150804	355		0.0092	5
106204	20150804	400		0.0113	5
106204	20150804	405		0.0139	6
106204	20150804	410		0.0293	7
106204	20150804	415		0.0172	5
106204	20150804	420		0.016	6
106204	20150804	425		0.0308	5
106204	20150804	430		0.0152	7
106204	20150804	435		0.0347	9
106204	20150804	440		0.0342	6
106204	20150804	445		0.0142	9
106204	20150804	450		0.0095	4
106204	20150804	455		0.0145	8
106204	20150804	500		0.013	7
106204	20150804	505		0.0125	7
106204	20150804	510		0.0145	8
106204	20150804	515		0.0729	11
106204	20150804	520		0.0287	10
106204	20150804	525		0.0427	8
106204	20150804	530		0.0389	12
106204	20150804	535		0.0476	14
106204	20150804	540		0.0524	15
106204	20150804	545		0.0288	18
106204	20150804	550		0.042	19
106204	20150804	555		0.1359	15
106204	20150804	600		0.0479	16
106204	20150804	605		0.0305	18
106204	20150804	610		0.0516	17
106204	20150804	615		0.0969	20
106204	20150804	620		0.0881	21
106204	20150804	625		0.1085	21
106204	20150804	630		0.0942	28
106204	20150804	635		0.2128	29
106204	20150804	640		0.2501	30
106204	20150804	645		0.214	32
106204	20150804	650		0.2244	38
106204	20150804	655		0.2313	43
106204	20150804	700		0.2958	48
106204	20150804	705		0.218	44
106204	20150804	710		0.2878	50
106204	20150804	715		0.2383	51
106204	20150804	720		0.3537	60
106204	20150804	725		0.4212	52
106204	20150804	730		0.2665	54
106204	20150804	735		0.2924	52
106204	20150804	740		0.3449	49
106204	20150804	745		0.4395	52
106204	20150804	750		0.4347	58
106204	20150804	755		0.4203	71
106204	20150804	800		0.4163	65
106204	20150804	805		0.4254	67
106204	20150804	810		0.5454	70
106204	20150804	815		0.6133	64
106204	20150804	820		0.5055	73
106204	20150804	825		0.5828	67
106204	20150804	830		0.6915	64
106204	20150804	835		0.6748	62
106204	20150804	840		0.6786	64
106204	20150804	845		0.6624	60
106204	20150804	850		0.6009	56
106204	20150804	855		0.5395	56
106204	20150804	900		0.5596	63
106204	20150804	905		0.5119	66
106204	20150804	910		0.4906	54
106204	20150804	915		0.5141	55
106204	20150804	920		0.5734	58
106204	20150804	925		0.5741	57
106204	20150804	930		0.574	58
106204	20150804	935		0.4443	58
106204	20150804	940		0.365	57
106204	20150804	945		0.5676	51
106204	20150804	950		0.4695	58
106204	20150804	955		0.5604	57
106204	20150804	1000		0.6662	55
106204	20150804	1005		0.5751	51
106204	20150804	1010		0.5559	53
106204	20150804	1015		0.4825	62
106204	20150804	1020		0.4143	53
106204	20150804	1025		0.4027	54
106204	20150804	1030		0.4433	54
106204	20150804	1035		0.4736	52
106204	20150804	1040		0.4744	56
106204	20150804	1045		0.4253	56
106204	20150804	1050		0.4119	53
106204	20150804	1055		0.3843	50
106204	20150804	1100		0.3798	55
106204	20150804	1105		0.3053	59
106204	20150804	1110		0.3229	46
106204	20150804	1115		0.2789	46
106204	20150804	1120		0.3231	55
106204	20150804	1125		0.4989	60
106204	20150804	1130		0.2114	43
106204	20150804	1135		0.3577	47
106204	20150804	1140		0.3325	50
106204	20150804	1145		0.3345	54
106204	20150804	1150		0.3303	47
106204	20150804	1155		0.2423	54
106204	20150804	1200		0.1529	47
106204	20150804	1205		0.1577	46
106204	20150804	1210		0.3177	49
106204	20150804	1215		0.2264	47
106204	20150804	1220		0.1991	48
106204	20150804	1225		0.1393	42
106204	20150804	1230		0.2137	41
106204	20150804	1235		0.1819	38
106204	20150804	1240		0.1462	42
106204	20150804	1245		0.2049	51
106204	20150804	1250		0.1566	47
106204	20150804	1255		0.2781	43
106204	20150804	1300		0.1859	50
106204	20150804	1305		0.2628	47
106204	20150804	1310		0.3126	53
106204	20150804	1315		0.2282	46
106204	20150804	1320		0.2773	49
106204	20150804	1325		0.3836	60
106204	20150804	1330		0.3791	59
106204	20150804	1335		0.3309	57
106204	20150804	1340		0.3548	56
106204	20150804	1345		0.3511	50
106204	20150804	1350		0.4085	61
106204	20150804	1355		0.4898	60
106204	20150804	1400		0.4487	59
106204	20150804	1405		0.5219	56
106204	20150804	1410		0.4032	59
106204	20150804	1415		0.3465	56
106204	20150804	1420		0.4091	52
106204	20150804	1425		0.3764	57
106204	20150804	1430		0.3575	59
106204	20150804	1435		0.3598	59
106204	20150804	1440		0.3278	53
106204	20150804	1445		0.3873	56
106204	20150804	1450		0.4907	57
106204	20150804	1455		0.4891	59
106204	20150804	1500		0.4383	60
106204	20150804	1505		0.4698	55
106204	20150804	1510		0.3647	55
106204	20150804	1515		0.4595	63
106204	20150804	1520		0.3563	57
106204	20150804	1525		0.4467	53
106204	20150804	1530		0.347	58
106204	20150804	1535		0.3749	61
106204	20150804	1540		0.3217	60
106204	20150804	1545		0.2901	49
106204	20150804	1550		0.4624	55
106204	20150804	1555		0.384	52
106204	20150804	1600		0.2834	59
106204	20150804	1605		0.3982	57
106204	20150804	1610		0.3082	59
106204	20150804	1615		0.3577	52
106204	20150804	1620		0.2411	50
106204	20150804	1625		0.3179	56
106204	20150804	1630		0.3412	56
106204	20150804	1635		0.34	52
106204	20150804	1640		0.4523	60
106204	20150804	1645		0.4772	61
106204	20150804	1650		0.359	62
106204	20150804	1655		0.4695	71
106204	20150804	1700		0.5638	63
106204	20150804	1705		0.6862	62
106204	20150804	1710		0.821	57
106204	20150804	1715		0.8968	58
106204	20150804	1720		0.8358	50
106204	20150804	1725		0.8857	53
106204	20150804	1730		0.8724	56
106204	20150804	1735		0.6632	59
106204	20150804	1740		0.6552	54
106204	20150804	1745		0.6909	58
106204	20150804	1750		0.7569	68
106204	20150804	1755		0.4758	56
106204	20150804	1800		0.5056	66
106204	20150804	1805		0.4964	66
106204	20150804	1810		0.3389	61
106204	20150804	1815		0.4894	62
106204	20150804	1820		0.3823	60
106204	20150804	1825		0.2504	56
106204	20150804	1830		0.3262	54
106204	20150804	1835		0.3363	55
106204	20150804	1840		0.2283	53
106204	20150804	1845		0.2247	56
106204	20150804	1850		0.2251	54
106204	20150804	1855		0.2622	50
106204	20150804	1900		0.1998	46
106204	20150804	1905		0.1841	44
106204	20150804	1910		0.1392	45
106204	20150804	1915		0.2121	45
106204	20150804	1920		0.1403	41
106204	20150804	1925		0.1965	43
106204	20150804	1930		0.1998	44
106204	20150804	1935		0.1693	41
106204	20150804	1940		0.2155	45
106204	20150804	1945		0.2087	40
106204	20150804	1950		0.1482	41
106204	20150804	1955		0.1853	40
106204	20150804	2000		0.1333	38
106204	20150804	2005		0.1466	40
106204	20150804	2010		0.1448	40
106204	20150804	2015		0.0907	34
106204	20150804	2020		0.1305	44
106204	20150804	2025		0.1227	43
106204	20150804	2030		0.1311	40
106204	20150804	2035		0.1591	38
106204	20150804	2040		0.1779	37
106204	20150804	2045		0.1348	39
106204	20150804	2050		0.162	37
106204	20150804	2055		0.1797	36
106204	20150804	2100		0.0912	33
106204	20150804	2105		0.1273	34
106204	20150804	2110		0.1259	34
106204	20150804	2115		0.1806	34
106204	20150804	2120		0.1001	34
106204	20150804	2125		0.0779	32
106204	20150804	2130		0.106	34
106204	20150804	2135		0.0975	33
106204	20150804	2140		0.1467	36
106204	20150804	2145		0.0572	28
106204	20150804	2150		0.0588	28
106204	20150804	2155		0.0955	26
106204	20150804	2200		0.0923	29
106204	20150804	2205		0.0657	26
106204	20150804	2210		0.0636	25
106204	20150804	2215		0.0534	26
106204	20150804	2220		0.0467	22
106204	20150804	2225		0.0509	27
106204	20150804	2230		0.0521	25
106204	20150804	2235		0.0367	20
106204	20150804	2240		0.0549	20
106204	20150804	2245		0.0389	19
106204	20150804	2250		0.0436	20
106204	20150804	2255		0.0375	21
106204	20150804	2300		0.0579	19
106204	20150804	2305		0.0558	19
106204	20150804	2310		0.0546	20
106204	20150804	2315		0.0313	17
106204	20150804	2320		0.0412	21
106204	20150804	2325		0.0417	18
106204	20150804	2330		0.0297	16
106204	20150804	2335		0.0363	18
106204	20150804	2340		0.0526	15
106204	20150804	2345		0.039	16
106204	20150804	2350		0.0345	17
106204	20150804	2355		0.034	18
106204	20150805	0		0.0314	16
106204	20150805	5		0.0296	16
106204	20150805	10		0.0321	17
106204	20150805	15		0.0269	16
106204	20150805	20		0.0302	15
106204	20150805	25		0.0306	16
106204	20150805	30		0.051	13
106204	20150805	35		0.0315	16
106204	20150805	40		0.0243	13
106204	20150805	45		0.0226	11
106204	20150805	50		0.0243	13
106204	20150805	55		0.0214	10
106204	20150805	100		0.0619	12
106204	20150805	105		0.024	11
106204	20150805	110		0.0212	10
106204	20150805	115		0.0215	10
106204	20150805	120		0.0174	10
106204	20150805	125		0.0248	13
106204	20150805	130		0.0233	11
106204	20150805	135		0.0187	9
106204	20150805	140		0.0247	6
106204	20150805	145		0.0358	10
106204	20150805	150		0.0222	10
106204	20150805	155		0.0166	8
106204	20150805	200		0.0174	7
106204	20150805	205		0.0199	10
106204	20150805	210		0.0172	8
106204	20150805	215		0.0261	14
106204	20150805	220		0.0196	12
106204	20150805	225		0.0175	9
106204	20150805	230		0.021	10
106204	20150805	235		0.0161	9
106204	20150805	240		0.0165	8
106204	20150805	245		0.0144	8
106204	20150805	250		0.0118	6
106204	20150805	255		0.0139	7
106204	20150805	300		0.0152	8
106204	20150805	305		0.0149	8
106204	20150805	310		0.0138	6
106204	20150805	315		0.0201	7
106204	20150805	320		0.0122	6
106204	20150805	325		0.0136	7
106204	20150805	330		0.0093	4
106204	20150805	335		0.0169	9
106204	20150805	340		0.0093	5
106204	20150805	345		0.0331	7
106204	20150805	350		0.0193	7
106204	20150805	355		0.0283	5
106204	20150805	400		0.0145	7
106204	20150805	405		0.0153	5
106204	20150805	410		0.0092	5
106204	20150805	415		0.0327	5
106204	20150805	420		0.0365	6
106204	20150805	425		0.0126	6
106204	20150805	430		0.0162	7
106204	20150805	435		0.0141	8
106204	20150805	440		0.0389	6
106204	20150805	445		0.0362	5
106204	20150805	450		0.0173	8
106204	20150805	455		0.0692	9
106204	20150805	500		0.0183	7
106204	20150805	505		0.0208	10
106204	20150805	510		0.0221	9
106204	20150805	515		0.0201	10
106204	20150805	520		0.0519	8
106204	20150805	525		0.0709	12
106204	20150805	530		0.025	13
106204	20150805	535		0.0448	16
106204	20150805	540		0.0192	9
106204	20150805	545		0.0463	15
106204	20150805	550		0.0713	13
106204	20150805	555		0.0371	14
106204	20150805	600		0.0771	13
106204	20150805	605		0.0823	18
106204	20150805	610		0.1351	18
106204	20150805	615		0.0794	20
106204	20150805	620		0.1753	26
106204	20150805	625		0.0734	20
106204	20150805	630		0.1667	24
106204	20150805	635		0.1702	27
106204	20150805	640		0.1459	29
106204	20150805	645		0.1062	32
106204	20150805	650		0.2024	41
106204	20150805	655		0.2014	44
106204	20150805	700		0.2519	42
106204	20150805	705		0.2944	44
106204	20150805	710		0.2764	49
106204	20150805	715		0.3522	58
106204	20150805	720		0.4244	49
106204	20150805	725		0.3326	56
106204	20150805	730		0.3288	52
106204	20150805	735		0.31	49
106204	20150805	740		0.3456	52
106204	20150805	745		0.3043	59
106204	20150805	750		0.4173	55
106204	20150805	755		0.4223	65
106204	20150805	800		0.4157	65
106204	20150805	805		0.5247	67
106204	20150805	810		0.4931	58
106204	20150805	815		0.5386	57
106204	20150805	820		0.4983	60
106204	20150805	825		0.6146	64
106204	20150805	830		0.5785	61
106204	20150805	835		0.5478	61
106204	20150805	840		0.6157	55
106204	20150805	845		0.5551	61
106204	20150805	850		0.6478	56
106204	20150805	855		0.6719	48
106204	20150805	900		0.6549	65
106204	20150805	905		0.4956	57
106204	20150805	910		0.4449	53
106204	20150805	915		0.6698	59
106204	20150805	920		0.4094	52
106204	20150805	925		0.4941	49
106204	20150805	930		0.4883	57
106204	20150805	935		0.4611	60
106204	20150805	940		0.5321	61
106204	20150805	945		0.3744	49
106204	20150805	950		0.3965	50
106204	20150805	955		0.4587	51
106204	20150805	1000		0.4486	54
106204	20150805	1005		0.4325	48
106204	20150805	1010		0.5262	50
106204	20150805	1015		0.3487	54
106204	20150805	1020		0.613	63
106204	20150805	1025		0.216	64
106204	20150805	1030		0.158	58
106204	20150805	1035		0.624	66
106204	20150805	1040		0.211	63
106204	20150805	1045		0.462	53
106204	20150805	1050		0.116	55
106204	20150805	1055		0.464	59
106204	20150805	1100		0.179	47
106204	20150805	1105		0.135	56
106204	20150805	1110		0.162	46
106204	20150805	1115		0.087	48
106204	20150805	1120		0.144	50
106204	20150805	1125		0.089	48
106204	20150805	1130		0.103	47
106204	20150805	1135		0.09	44
106204	20150805	1140		0.097	54
106204	20150805	1145		0.434	61
106204	20150805	1150		0.539	54
106204	20150805	1155		0.268	54
106204	20150805	1200		0.093	44
106204	20150805	1205		0.073	30
106204	20150805	1210		0.11	57
106204	20150805	1215		0.094	42
106204	20150805	1220		0.107	41
106204	20150805	1225		0.11	38
106204	20150805	1230		0.083	39
106204	20150805	1235		0.058	36
106204	20150805	1240		0.047	29
106204	20150805	1245		0.107	42
106204	20150805	1250		0.141	48
106204	20150805	1255		0.126	57
106204	20150805	1300		0.083	41
106204	20150805	1305		0.393	47
106204	20150805	1310		0.374	53
106204	20150805	1315		0.137	59
106204	20150805	1320		0.355	49
106204	20150805	1325		0.429	58
106204	20150805	1330		0.443	61
106204	20150805	1335		0.169	60
106204	20150805	1340		0.405	64
106204	20150805	1345		0.108	41
106204	20150805	1350		0.187	56
106204	20150805	1355		0.537	52
106204	20150805	1400		0.337	52
106204	20150805	1405		0.377	57
106204	20150805	1410		0.2	60
106204	20150805	1415		0.36	57
106204	20150805	1420		0.236	57
106204	20150805	1425		0.203	53
106204	20150805	1430		0.648	85
106204	20150805	1435		0.273	52
106204	20150805	1440		0.179	56
106204	20150805	1445		0.324	56
106204	20150805	1450		0.561	55
106204	20150805	1455		0.422	61
106204	20150805	1500		0.301	51
106204	20150805	1505		0.678	59
106204	20150805	1510		0.435	55
106204	20150805	1515		0.351	58
106204	20150805	1520		0.226	61
106204	20150805	1525		0.323	56
106204	20150805	1530		0.216	69
106204	20150805	1535		0.549	68
106204	20150805	1540		0.464	60
106204	20150805	1545		0.869	49
106204	20150805	1550		0.644	57
106204	20150805	1555		0.336	51
106204	20150805	1600		0.154	41
106204	20150805	1605		0.262	64
106204	20150805	1610		0.231	64
106204	20150805	1615		0.133	32
106204	20150805	1620		0.204	69
106204	20150805	1625		0.227	61
106204	20150805	1630		0.156	55
106204	20150805	1635		0.505	53
106204	20150805	1640		0.347	56
106204	20150805	1645		0.487	48
106204	20150805	1650		0.202	58
106204	20150805	1655		0.612	57
106204	20150805	1700		0.544	68
106204	20150805	1705		0.708	66
106204	20150805	1710		0.707	57
106204	20150805	1715		0.781	60
106204	20150805	1720		0.8	41
106204	20150805	1725		0.963	57
106204	20150805	1730		0.628	63
106204	20150805	1735		0.649	74
106204	20150805	1740		0.656	63
106204	20150805	1745		0.804	72
106204	20150805	1750		0.96	66
106204	20150805	1755		0.658	61
106204	20150805	1800		0.5525	69
106204	20150805	1805		0.6995	45
106204	20150805	1810		0.5545	59
106204	20150805	1815		0.604	75
106204	20150805	1820		0.258	58
106204	20150805	1825		0.187	64
106204	20150805	1830		0.121	58
106204	20150805	1835		0.429	55
106204	20150805	1840		0.193	51
106204	20150805	1845		0.225	53
106204	20150805	1850		0.124	50
106204	20150805	1855		0.189	63
106204	20150805	1900		0.124	59
106204	20150805	1905		0.158	59
106204	20150805	1910		0.141	53
106204	20150805	1915		0.155	52
106204	20150805	1920		0.111	43
106204	20150805	1925		0.176	52
106204	20150805	1930		0.083	39
106204	20150805	1935		0.119	47
106204	20150805	1940		0.09	35
106204	20150805	1945		0.189	47
106204	20150805	1950		0.424	42
106204	20150805	1955		0.153	40
106204	20150805	2000		0.105	43
106204	20150805	2005		0.081	40
106204	20150805	2010		0.114	53
106204	20150805	2015		0.203	44
106204	20150805	2020		0.103	49
106204	20150805	2025		0.096	36
106204	20150805	2030		0.104	49
106204	20150805	2035		0.078	39
106204	20150805	2040		0.107	38
106204	20150805	2045		0.143	41
106204	20150805	2050		0.089	31
106204	20150805	2055		0.116	46
106204	20150805	2100		0.109	53
106204	20150805	2105		0.078	40
106204	20150805	2110		0.081	35
106204	20150805	2115		0.087	42
106204	20150805	2120		0.075	37
106204	20150805	2125		0.078	43
106204	20150805	2130		0.094	43
106204	20150805	2135		0.109	44
106204	20150805	2140		0.076	40
106204	20150805	2145		0.069	37
106204	20150805	2150		0.078	42
106204	20150805	2155		0.08	40
106204	20150805	2200		0.072	35
106204	20150805	2205		0.045	27
106204	20150805	2210		0.065	33
106204	20150805	2215		0.056	21
106204	20150805	2220		0.057	26
106204	20150805	2225		0.039	19
106204	20150805	2230		0.026	21
106204	20150805	2235		0.04	22
106204	20150805	2240		0.031	20
106204	20150805	2245		0.038	25
106204	20150805	2250		0.041	25
106204	20150805	2255		0.04	27
106204	20150805	2300		0.034	23
106204	20150805	2305		0.045	29
106204	20150805	2310		0.029	23
106204	20150805	2315		0.033	24
106204	20150805	2320		0.029	21
106204	20150805	2325		0.035	19
106204	20150805	2330		0.018	13
106204	20150805	2335		0.024	15
106204	20150805	2340		0.03	20
106204	20150805	2345		0.048	24
106204	20150805	2350		0.026	15
106204	20150805	2355		0.03	17
106204	20150806	0		0.029	17
106204	20150806	5		0.03	21
106204	20150806	10		0.013	12
106204	20150806	15		0.032	20
106204	20150806	20		0.03	19
106204	20150806	25		0.029	16
106204	20150806	30		0.052	29
106204	20150806	35		0.031	18
106204	20150806	40		0.017	11
106204	20150806	45		0.025	18
106204	20150806	50		0.029	16
106204	20150806	55		0.032	19
106204	20150806	100		0.018	13
106204	20150806	105		0.018	12
106204	20150806	110		0.025	14
106204	20150806	115		0.021	15
106204	20150806	120		0.017	10
106204	20150806	125		0.035	17
106204	20150806	130		0.014	9
106204	20150806	135		0.005	5
106204	20150806	140		0.015	14
106204	20150806	145		0.008	6
106204	20150806	150		0.025	13
106204	20150806	155		0.023	15
106204	20150806	200		0.018	11
106204	20150806	205		0.022	13
106204	20150806	210		0.021	15
106204	20150806	215		0.01	8
106204	20150806	220		0.023	13
106204	20150806	225		0.031	17
106204	20150806	230		0.011	5
106204	20150806	235		0.021	15
106204	20150806	240		0.031	20
106204	20150806	245		0.009	11
106204	20150806	250		0.015	10
106204	20150806	255		0.011	8
106204	20150806	300		0.007	7
106204	20150806	305		0.009	7
106204	20150806	310		0.012	9
106204	20150806	315		0.011	9
106204	20150806	320		0.016	8
106204	20150806	325		0.019	11
106204	20150806	330		0.014	9
106204	20150806	335		0.013	11
106204	20150806	340		0.01	8
106204	20150806	345		0.004	7
106204	20150806	350		0.016	10
106204	20150806	355		0.023	15
106204	20150806	400		0.014	8
106204	20150806	405		0.01	7
106204	20150806	410		0.012	9
106204	20150806	415		0.014	11
106204	20150806	420		0.016	11
106204	20150806	425		0.009	9
106204	20150806	430		0.008	6
106204	20150806	435		0.008	6
106204	20150806	440		0.016	12
106204	20150806	445		0.043	19
106204	20150806	450		0.014	8
106204	20150806	455		0.013	11
106204	20150806	500		0.011	11
106204	20150806	505		0.017	12
106204	20150806	510		0.009	6
106204	20150806	515		0.032	17
106204	20150806	520		0.022	15
106204	20150806	525		0.021	18
106204	20150806	530		0.039	24
106204	20150806	535		0.016	12
106204	20150806	540		0.022	19
106204	20150806	545		0.027	21
106204	20150806	550		0.039	32
106204	20150806	555		0.044	24
106204	20150806	600		0.036	27
106204	20150806	605		0.048	31
106204	20150806	610		0.129	31
106204	20150806	615		0.053	23
106204	20150806	620		0.051	24
106204	20150806	625		0.047	33
106204	20150806	630		0.218	30
106204	20150806	635		0.051	34
106204	20150806	640		0.039	29
106204	20150806	645		0.049	30
106204	20150806	650		0.196	43
106204	20150806	655		0.082	40
106204	20150806	700		0.219	43
106204	20150806	705		0.373	42
106204	20150806	710		0.112	58
106204	20150806	715		0.189	46
106204	20150806	720		0.38	78
106204	20150806	725		0.098	50
106204	20150806	730		0.118	47
106204	20150806	735		0.251	64
106204	20150806	740		0.235	57
106204	20150806	745		0.179	71
106204	20150806	750		0.165	49
106204	20150806	755		0.439	85
106204	20150806	800		0.528	63
106204	20150806	805		0.655	69
106204	20150806	810		0.136	61
106204	20150806	815		0.724	78
106204	20150806	820		0.34	77
106204	20150806	825		0.275	81
106204	20150806	830		0.519	80
106204	20150806	835		1	53
106204	20150806	840		0.664	81
106204	20150806	845		0.178	71
106204	20150806	850		0.551	57
106204	20150806	855		0.483	51
106204	20150806	900		0.403	65
106204	20150806	905		0.436	64
106204	20150806	910		0.861	40
106204	20150806	915		0.59	77
106204	20150806	920		0.474	74
106204	20150806	925		0.16	48
106204	20150806	930		0.514	57
106204	20150806	935		0.586	55
106204	20150806	940		0.131	59
106204	20150806	945		0.433	84
106204	20150806	950		0.662	73
106204	20150806	955		0.702	58
106204	20150806	1000		0.441	68
106204	20150806	1005		0.199	54
106204	20150806	1010		0.517	56
106204	20150806	1015		0.584	67
106204	20150806	1020		0.174	64
106204	20150806	1025		0.105	52
106204	20150806	1030		0.239	52
106204	20150806	1035		0.204	54
106204	20150806	1040		0.372	59
106204	20150806	1045		0.141	51
106204	20150806	1050		0.139	54
106204	20150806	1055		0.487	36
106204	20150806	1100		0.173	57
106204	20150806	1105		0.193	52
106204	20150806	1110		0.101	53
106204	20150806	1115		0.175	55
106204	20150806	1120		0.092	41
106204	20150806	1125		0.179	53
106204	20150806	1130		0.116	57
106204	20150806	1135		0.136	50
106204	20150806	1140		0.622	74
106204	20150806	1145		0.283	71
106204	20150806	1150		0.174	53
106204	20150806	1155		0.104	48
106204	20150806	1200		0.152	55
106204	20150806	1205		0.207	50
106204	20150806	1210		0.103	49
106204	20150806	1215		0.085	36
106204	20150806	1220		0.106	43
106204	20150806	1225		0.11	52
106204	20150806	1230		0.092	47
106204	20150806	1235		0.074	36
106204	20150806	1240		0.108	47
106204	20150806	1245		0.154	56
106204	20150806	1250		0.092	48
106204	20150806	1255		0.058	32
106204	20150806	1300		0.078	40
106204	20150806	1305		0.165	44
106204	20150806	1310		0.089	53
106204	20150806	1315		0.089	36
106204	20150806	1320		0.216	49
106204	20150806	1325		0.267	56
106204	20150806	1330		0.36	67
106204	20150806	1335		0.091	47
106204	20150806	1340		0.115	62
106204	20150806	1345		0.139	48
106204	20150806	1350		0.564	82
106204	20150806	1355		0.189	58
106204	20150806	1400		0.102	42
106204	20150806	1405		0.256	52
106204	20150806	1410		0.236	72
106204	20150806	1415		0.455	65
106204	20150806	1420		0.134	58
106204	20150806	1425		0.198	45
106204	20150806	1430		0.273	56
106204	20150806	1435		0.6082	63
106204	20150806	1440		0.153	47
106204	20150806	1445		0.128	55
106204	20150806	1450		0.5388	44
106204	20150806	1455		0.306	66
106204	20150806	1500		0.293	77
106204	20150806	1505		0.545	83
106204	20150806	1510		0.37	54
106204	20150806	1515		0.259	60
106204	20150806	1520		0.158	52
106204	20150806	1525		0.49	56
106204	20150806	1530		0.16	59
106204	20150806	1535		0.175	66
106204	20150806	1540		0.224	52
106204	20150806	1545		0.415	69
106204	20150806	1550		0.346	59
106204	20150806	1555		0.6857	59
106204	20150806	1600		0.236	53
106204	20150806	1605		0.203	64
106204	20150806	1610		0.161	39
106204	20150806	1615		0.086	44
106204	20150806	1620		0.152	69
106204	20150806	1625		0.142	54
106204	20150806	1630		0.202	50
106204	20150806	1635		0.367	63
106204	20150806	1640		0.527	56
106204	20150806	1645		0.272	61
106204	20150806	1650		0.31	47
106204	20150806	1655		0.368	73
106204	20150806	1700		0.801	76
106204	20150806	1705		0.9	54
106204	20150806	1710		0.93	38
106204	20150806	1715		0.989	51
106204	20150806	1720		0.8555	59
106204	20150806	1725		0.715	49
106204	20150806	1730		0.879	79
106204	20150806	1735		0.782	62
106204	20150806	1740		0.817	71
106204	20150806	1745		0.451	69
106204	20150806	1750		0.543	80
106204	20150806	1755		0.387	52
106204	20150806	1800		0.761	63
106204	20150806	1805		0.928	57
106204	20150806	1810		0.872	61
106204	20150806	1815		0.767	57
106204	20150806	1820		0.299	73
106204	20150806	1825		0.455	71
106204	20150806	1830		0.337	71
106204	20150806	1835		0.153	63
106204	20150806	1840		0.189	54
106204	20150806	1845		0.201	50
106204	20150806	1850		0.194	64
106204	20150806	1855		0.214	65
106204	20150806	1900		0.19	53
106204	20150806	1905		0.213	67
106204	20150806	1910		0.144	47
106204	20150806	1915		0.118	53
106204	20150806	1920		0.134	54
106204	20150806	1925		0.111	50
106204	20150806	1930		0.173	33
106204	20150806	1935		0.4692	51
106204	20150806	1940		0.1065	47
106204	20150806	1945		0.147	49
106204	20150806	1950		0.212	53
106204	20150806	1955		0.245	50
106204	20150806	2000		0.138	36
106204	20150806	2005		0.094	40
106204	20150806	2010		0.098	47
106204	20150806	2015		0.124	49
106204	20150806	2020		0.118	51
106204	20150806	2025		0.092	41
106204	20150806	2030		0.093	50
106204	20150806	2035		0.065	35
106204	20150806	2040		0.088	36
106204	20150806	2045		0.314	42
106204	20150806	2050		0.088	39
106204	20150806	2055		0.064	33
106204	20150806	2100		0.054	31
106204	20150806	2105		0.052	31
106204	20150806	2110		0.051	28
106204	20150806	2115		0.086	38
106204	20150806	2120		0.067	32
106204	20150806	2125		0.077	38
106204	20150806	2130		0.266	37
106204	20150806	2135		0.071	35
106204	20150806	2140		0.072	38
106204	20150806	2145		0.066	33
106204	20150806	2150		0.077	35
106204	20150806	2155		0.046	26
106204	20150806	2200		0.056	33
106204	20150806	2205		0.055	29
106204	20150806	2210		0.058	33
106204	20150806	2215		0.074	36
106204	20150806	2220		0.047	27
106204	20150806	2225		0.052	25
106204	20150806	2230		0.065	41
106204	20150806	2235		0.032	21
106204	20150806	2240		0.047	22
106204	20150806	2245		0.039	24
106204	20150806	2250		0.025	16
106204	20150806	2255		0.027	18
106204	20150806	2300		0.041	26
106204	20150806	2305		0.062	33
106204	20150806	2310		0.058	29
106204	20150806	2315		0.034	26
106204	20150806	2320		0.036	22
106204	20150806	2325		0.032	21
106204	20150806	2330		0.024	18
106204	20150806	2335		0.027	24
106204	20150806	2340		0.036	27
106204	20150806	2345		0.047	26
106204	20150806	2350		0.035	21
106204	20150806	2355		0.025	18
106204	20150807	0		0.033	20
106204	20150807	5		0.03	23
106204	20150807	10		0.027	16
106204	20150807	15		0.033	19
106204	20150807	20		0.037	23
106204	20150807	25		0.02	15
106204	20150807	30		0.011	9
106204	20150807	35		0.026	18
106204	20150807	40		0.006	6
106204	20150807	45		0.03	20
106204	20150807	50		0.033	17
106204	20150807	55		0.015	12
106204	20150807	100		0.039	22
106204	20150807	105		0.017	12
106204	20150807	110		0.023	16
106204	20150807	115		0.018	14
106204	20150807	120		0.015	9
106204	20150807	125		0.022	13
106204	20150807	130		0.023	13
106204	20150807	135		0.011	9
106204	20150807	140		0.024	17
106204	20150807	145		0.033	15
106204	20150807	150		0.013	9
106204	20150807	155		0.015	7
106204	20150807	200		0.013	10
106204	20150807	205		0.013	9
106204	20150807	210		0.019	12
106204	20150807	215		0.019	11
106204	20150807	220		0.014	10
106204	20150807	225		0.004	4
106204	20150807	230		0.014	10
106204	20150807	235		0.017	16
106204	20150807	240		0.015	12
106204	20150807	245		0.024	10
106204	20150807	250		0.019	14
106204	20150807	255		0.007	4
106204	20150807	300		0.017	12
106204	20150807	305		0.008	7
106204	20150807	310		0.014	11
106204	20150807	315		0.027	15
106204	20150807	320		0.033	21
106204	20150807	325		0.02	11
106204	20150807	330		0.02	10
106204	20150807	335		0.014	9
106204	20150807	340		0.002	2
106204	20150807	345		0.014	8
106204	20150807	350		0.011	8
106204	20150807	355		0.009	8
106204	20150807	400		0.013	11
106204	20150807	405		0.014	11
106204	20150807	410		0.013	8
106204	20150807	415		0.016	11
106204	20150807	420		0.012	10
106204	20150807	425		0.019	13
106204	20150807	430		0.013	8
106204	20150807	435		0.015	13
106204	20150807	440		0.008	8
106204	20150807	445		0.018	14
106204	20150807	450		0.025	13
106204	20150807	455		0.016	13
106204	20150807	500		0.048	15
106204	20150807	505		0.022	15
106204	20150807	510		0.015	13
106204	20150807	515		0.159	20
106204	20150807	520		0.012	9
106204	20150807	525		0.014	15
106204	20150807	530		0.026	22
106204	20150807	535		0.018	15
106204	20150807	540		0.018	18
106204	20150807	545		0.036	21
106204	20150807	550		0.048	29
106204	20150807	555		0.034	24
106204	20150807	600		0.018	17
106204	20150807	605		0.085	29
106204	20150807	610		0.057	32
106204	20150807	615		0.115	25
106204	20150807	620		0.079	26
106204	20150807	625		0.045	26
106204	20150807	630		0.083	25
106204	20150807	635		0.049	27
106204	20150807	640		0.065	31
106204	20150807	645		0.091	37
106204	20150807	650		0.157	38
106204	20150807	655		0.171	44
106204	20150807	700		0.078	40
106204	20150807	705		0.192	37
106204	20150807	710		0.089	48
106204	20150807	715		0.339	54
106204	20150807	720		0.116	53
106204	20150807	725		0.116	46
106204	20150807	730		0.082	42
106204	20150807	735		0.244	69
106204	20150807	740		0.401	49
106204	20150807	745		0.254	54
106204	20150807	750		0.366	55
106204	20150807	755		0.243	67
106204	20150807	800		0.681	69
106204	20150807	805		0.675	72
106204	20150807	810		0.19	59
106204	20150807	815		0.622	63
106204	20150807	820		0.577	71
106204	20150807	825		0.487	84
106204	20150807	830		0.311	71
106204	20150807	835		0.351	53
106204	20150807	840		0.74	64
106204	20150807	845		0.728	72
106204	20150807	850		0.478	53
106204	20150807	855		0.9	72
106204	20150807	900		0.707	61
106204	20150807	905		0.332	71
106204	20150807	910		0.132	51
106204	20150807	915		0.288	68
106204	20150807	920		0.169	53
106204	20150807	925		0.608	61
106204	20150807	1010		0.405	65
106204	20150807	1015		0.453	53
106204	20150807	1020		0.231	58
106204	20150807	1025		0.227	60
106204	20150807	1035		0.1775	32
106204	20150807	1040		0.104	46
106204	20150807	1045		0.318	64
106204	20150807	1050		0.192	51
106204	20150807	1055		0.361	56
106204	20150807	1100		0.197	51
106204	20150807	1105		0.339	59
106204	20150807	1110		0.109	44
106204	20150807	1115		0.38	48
106204	20150807	1120		0.151	49
106204	20150807	1125		0.133	55
106204	20150807	1130		0.232	47
106204	20150807	1135		0.099	50
106204	20150807	1140		0.377	55
106204	20150807	1145		0.194	51
106204	20150807	1150		0.15	54
106204	20150807	1155		0.179	45
106204	20150807	1200		0.08	45
106204	20150807	1205		0.3	44
106204	20150807	1210		0.136	52
106204	20150807	1215		0.132	54
106204	20150807	1220		0.094	40
106204	20150807	1225		0.315	38
106204	20150807	1230		0.11	44
106204	20150807	1235		0.072	30
106204	20150807	1240		0.103	51
106204	20150807	1245		0.176	54
106204	20150807	1250		0.152	59
106204	20150807	1255		0.23	43
106204	20150807	1300		0.446	50
106204	20150807	1305		0.132	47
106204	20150807	1310		0.154	62
106204	20150807	1315		0.5554	44
106204	20150807	1320		0.8765	49
106204	20150807	1325		1	42
106204	20150807	1330		1	46
106204	20150807	1335		0.6883	43
106204	20150807	1340		0.952	63
106204	20150807	1345		1	52
106204	20150807	1350		0.791	59
106204	20150807	1355		0.577	57
106204	20150807	1400		0.582	48
106204	20150807	1405		0.143	46
106204	20150807	1410		0.144	58
106204	20150807	1415		0.142	58
106204	20150807	1420		0.197	56
106204	20150807	1425		0.4	62
106204	20150807	1430		0.297	65
106204	20150807	1435		0.476	63
106204	20150807	1440		0.745	51
106204	20150807	1445		0.509	62
106204	20150807	1450		0.398	46
106204	20150807	1455		0.577	51
106204	20150807	1500		0.355	61
106204	20150807	1505		0.449	47
106204	20150807	1510		0.871	46
106204	20150807	1515		0.496	52
106204	20150807	1520		0.629	68
106204	20150807	1525		0.5556	65
106204	20150807	1530		0.445	51
106204	20150807	1535		0.5127	60
106204	20150807	1540		0.732	46
106204	20150807	1545		0.89	65
106204	20150807	1550		0.897	48
106204	20150807	1555		0.394	49
106204	20150807	1600		0.146	56
106204	20150807	1605		0.174	52
106204	20150807	1610		0.517	72
106204	20150807	1615		0.459	67
106204	20150807	1620		0.57	55
106204	20150807	1625		0.492	63
106204	20150807	1630		0.623	53
106204	20150807	1635		0.898	58
106204	20150807	1640		0.751	68
106204	20150807	1645		0.49	58
106204	20150807	1650		0.201	60
106204	20150807	1655		0.377	74
106204	20150807	1700		0.86	61
106204	20150807	1705		0.525	74
106204	20150807	1710		0.937	60
106204	20150807	1715		0.995	59
106204	20150807	1720		0.85	69
106204	20150807	1725		0.9776	50
106204	20150807	1730		0.928	60
106204	20150807	1735		0.7903	64
106204	20150807	1740		0.808	70
106204	20150807	1745		0.9029	71
106204	20150807	1750		0.8748	51
106204	20150807	1755		0.623	71
106204	20150807	1800		0.397	65
106204	20150807	1805		0.686	66
106204	20150807	1810		0.581	57
106204	20150807	1815		0.423	54
106204	20150807	1820		0.223	59
106204	20150807	1825		0.7027	86
106204	20150807	1830		0.2957	59
106204	20150807	1835		0.161	56
106204	20150807	1840		0.355	63
106204	20150807	1845		0.245	56
106204	20150807	1850		0.158	49
106204	20150807	1855		0.596	65
106204	20150807	1900		0.156	54
106204	20150807	1905		0.11	47
106204	20150807	1910		0.107	52
106204	20150807	1915		0.08	41
106204	20150807	1920		0.226	48
106204	20150807	1925		0.134	47
106204	20150807	1930		0.083	42
106204	20150807	1935		0.34	43
106204	20150807	1940		0.117	48
106204	20150807	1945		0.081	41
106204	20150807	1950		0.174	50
106204	20150807	1955		0.221	47
106204	20150807	2000		0.106	42
106204	20150807	2005		0.122	59
106204	20150807	2010		0.295	53
106204	20150807	2015		0.454	43
106204	20150807	2020		0.072	40
106204	20150807	2025		0.169	42
106204	20150807	2030		0.096	42
106204	20150807	2035		0.613	40
106204	20150807	2040		0.172	36
106204	20150807	2045		0.329	46
106204	20150807	2050		0.116	45
106204	20150807	2055		0.077	41
106204	20150807	2100		0.089	38
106204	20150807	2105		0.055	36
106204	20150807	2110		0.067	35
106204	20150807	2115		0.076	37
106204	20150807	2120		0.313	43
106204	20150807	2125		0.079	41
106204	20150807	2130		0.049	27
106204	20150807	2135		0.075	39
106204	20150807	2140		0.101	44
106204	20150807	2145		0.083	38
106204	20150807	2150		0.034	20
106204	20150807	2155		0.049	30
106204	20150807	2200		0.115	40
106204	20150807	2205		0.053	33
106204	20150807	2210		0.07	32
106204	20150807	2215		0.075	27
106204	20150807	2220		0.043	22
106204	20150807	2225		0.088	31
106204	20150807	2230		0.068	33
106204	20150807	2235		0.024	15
106204	20150807	2240		0.06	36
106204	20150807	2245		0.052	29
106204	20150807	2250		0.052	26
106204	20150807	2255		0.078	36
106204	20150807	2300		0.047	27
106204	20150807	2305		0.157	28
106204	20150807	2310		0.036	21
106204	20150807	2315		0.036	18
[truncated: 225,397 more rows]
